# Supplementary material for: The Optimal Carrier-Secret Ratio for Wireless Covert Channels Based on Constellation Shaping Modulation
Source: Hindawi journal article supplement (doi:10.1155/2021/6919530), 2021-12-03
Supplement: f1 [file 6919530.f1.zip]

Archive with 3 entries (3 files):
- BERs of wireless covert communication in typical scenarios.docx
- KL divergence of constellation errors with different CSR.docx
- KS distances of constellation errors with different CSR.docx
