# Supplementary material for: The Optimal Carrier-Secret Ratio for Wireless Covert Channels Based on Constellation Shaping Modulation
Source: Hindawi journal article supplement (doi:10.1155/2021/6919530), 2021-12-03
Supplement: f1 [file 6919530.f1.zip › BERs of wireless covert communication in typical scenarios.docx]

(a) BERs of classic scenario with different SNR

(b) BERs of one relay with different SNR

(c) BERs of two relays with different SNR

(d) Comparison of BERs of several scenarios
