# Supplementary material for: The Optimal Carrier-Secret Ratio for Wireless Covert Channels Based on Constellation Shaping Modulation
Source: Hindawi journal article supplement (doi:10.1155/2021/6919530), 2021-12-03
Supplement: f1 [file 6919530.f1.zip › KS distances of constellation errors with different CSR.docx]

KS I

KS Q

KS magnitude

KS phase
